# Supplementary material for: Preparation of a novel Bi9O7.5S6/SnS composite film with improved photoelectric properties
Source: Royal Society of Chemistry journal article supplement (doi:10.1039/d3dt02186f), 2023-01-01
Supplement: d3dt02186f1.pdf [file d3dt02186f1.pdf]

Supplementary information for:

## **Preparation of novel Bi<sub>9</sub>O<sub>7.5</sub>S<sub>6</sub>/SnS composite film with improved photoelectric properties**

**Tianhong Luo,<sup>a</sup> Jing Wang,<sup>a</sup> Zhanqiang Liu,<sup>b</sup> Shu Chen,<sup>a</sup> Jingshan Hou,<sup>a</sup> Yongzheng Fang,<sup>\*,a</sup> Yanwei Huang<sup>\*,a</sup> and Ganghua Zhang<sup>\*,a</sup>**

*<sup>a</sup>School of Materials Science and Engineering, Shanghai Institute of Technology, Shanghai 201418, P. R. China;*

*<sup>b</sup>Department of Materials Chemistry, Huzhou University, 759 East Erhuan Road, Huzhou, 313000, P. R. China.*

***E-mail addresses:*** fyz1003@sina.com (Y.Z. Fang), ywhuang@sit.edu.cn (Y.W. Huang) and ganghuazhang@sit.edu.cn (G.H. Zhang)

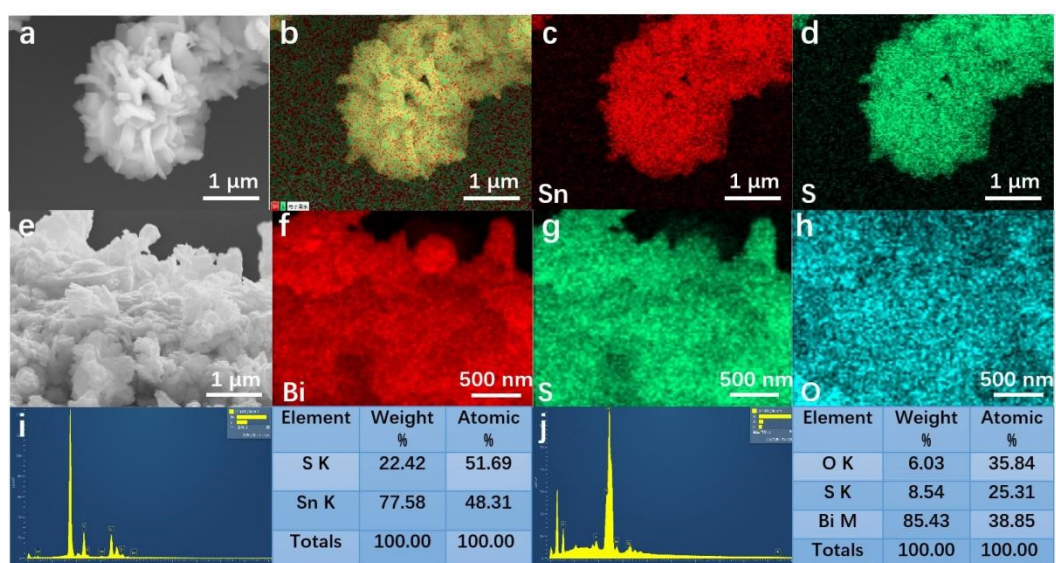

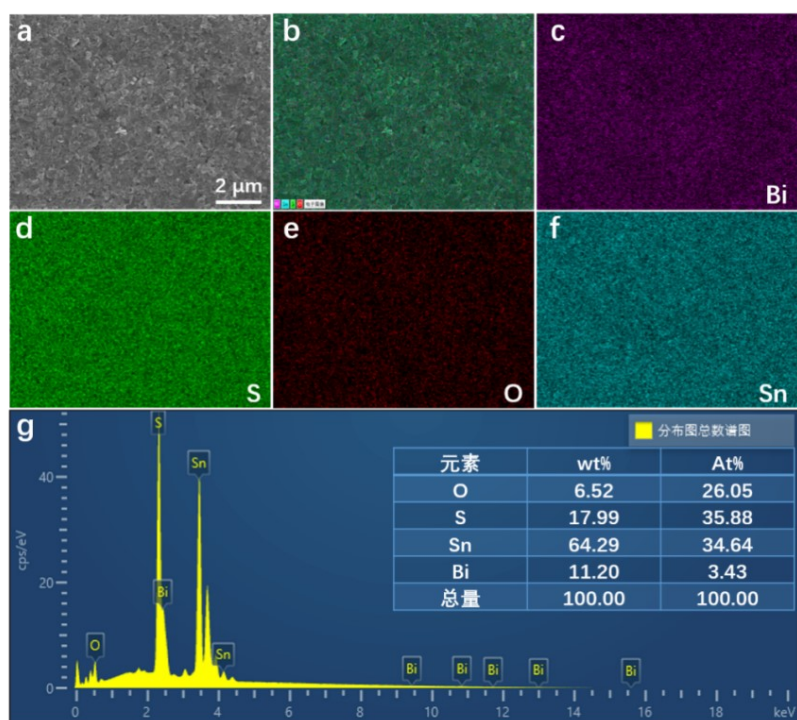

**Figure S2.** EDS mapping images (a-f) and corresponding EDS results (g) of the  $\text{Bi}_9\text{O}_{7.5}\text{S}_6/\text{SnS}/\text{ITO}$  composite sample.

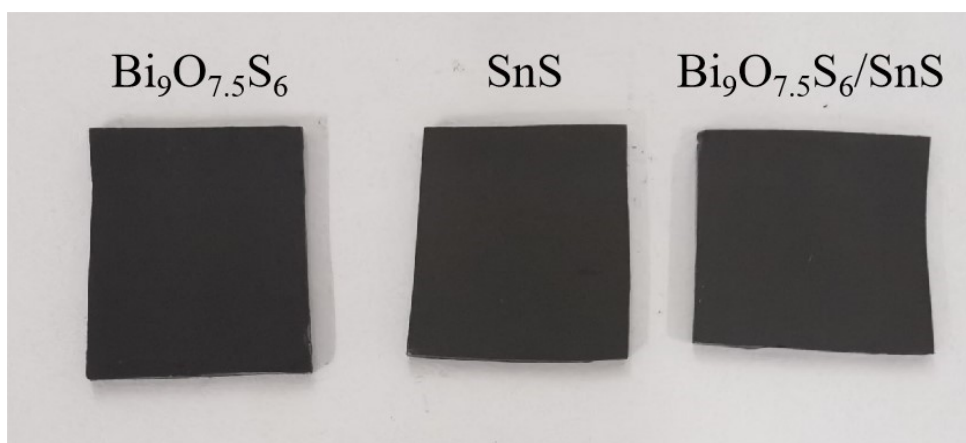

**Figure S3.** The optical photographs of  $\text{Bi}_9\text{O}_{7.5}\text{S}_6$ ,  $\text{SnS}$ , and  $\text{Bi}_9\text{O}_{7.5}\text{S}_6/\text{SnS}$  films.

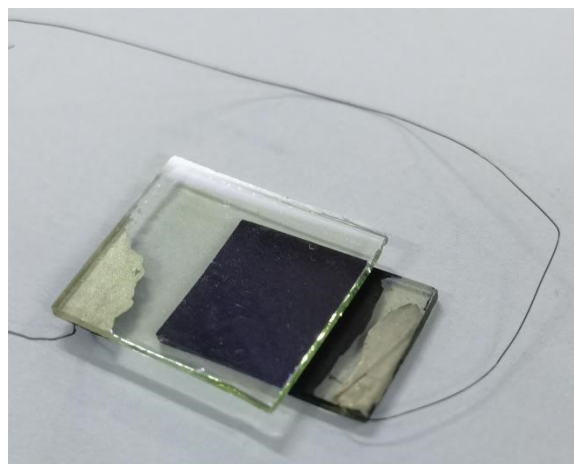

**Figure S4.** The physical appearance of the device.

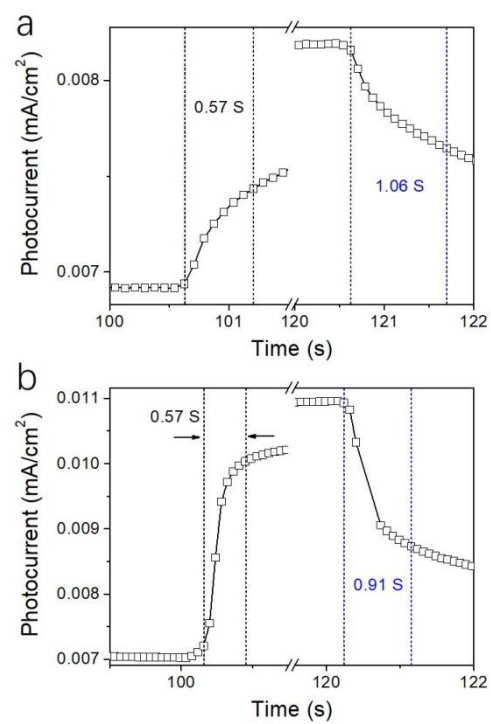

**Figure S5.** Response times of Bi<sub>9</sub>O<sub>7.5</sub>S<sub>6</sub> (a) and SnS (b) films at 1 V bias voltage.

| Name of the sample                                   | Photoresponsivity<br>(mA/W) | Response time<br>(s) | Optical bandgap<br>(eV) | Ref.      |
|------------------------------------------------------|-----------------------------|----------------------|-------------------------|-----------|
| Bi <sub>9</sub> O <sub>7.5</sub> S <sub>6</sub> /SnS | 40.1                        | 0.49/0.74            | 1.2                     | This work |
| SnS/Si                                               | 86.2                        | 0.15                 | 1.0                     | 29        |
| SnS/WS <sub>2</sub>                                  | 719                         | 5                    | -                       | 30        |
| SnS <sub>2</sub> /SnS                                | 35                          | 0.9                  | -                       | 31        |
| SnS/CdS                                              | 10.4                        | 1                    | 1.1-2.4                 | 32        |

**Table S1.** Comparison table of photodetection devices output performance.

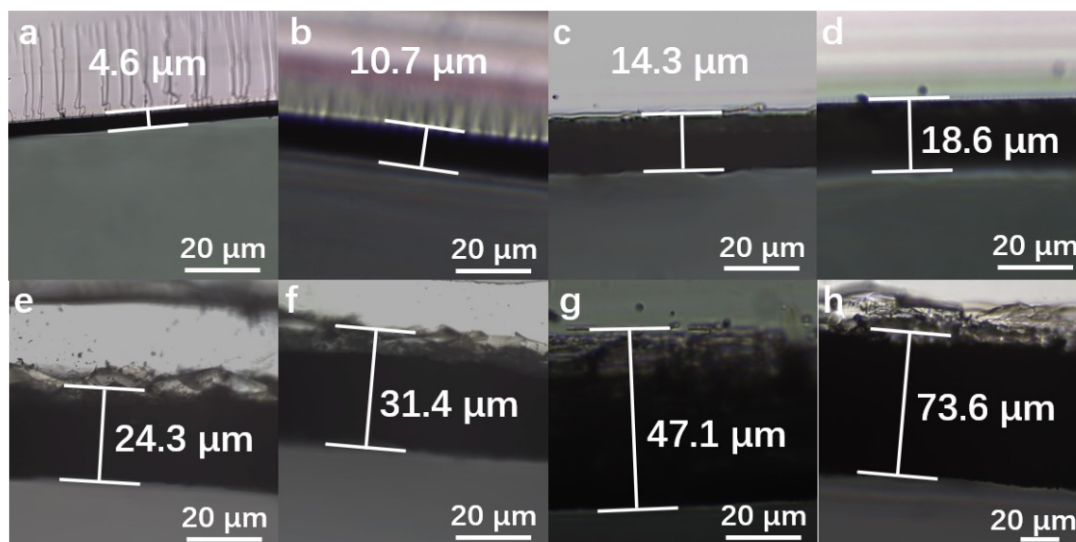

**Figure S6.** Cross-sectional optical micrographs of  $\text{Bi}_9\text{O}_{7.5}\text{S}_6/\text{SnS}/\text{ITO}$  composite films with different thicknesses.

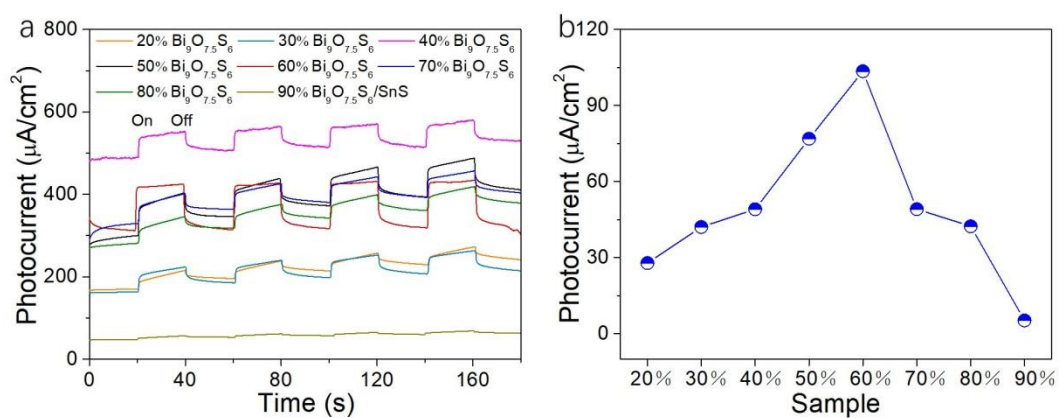

**Figure S7.** (a)  $J$ - $t$  curves of Bi<sub>9</sub>O<sub>7.5</sub>S<sub>6</sub>/SnS/ITO devices with different ratios of Bi<sub>9</sub>O<sub>7.5</sub>S<sub>6</sub>/SnS. (b) Corresponding photocurrent for different ratios of Bi<sub>9</sub>O<sub>7.5</sub>S<sub>6</sub>/SnS.

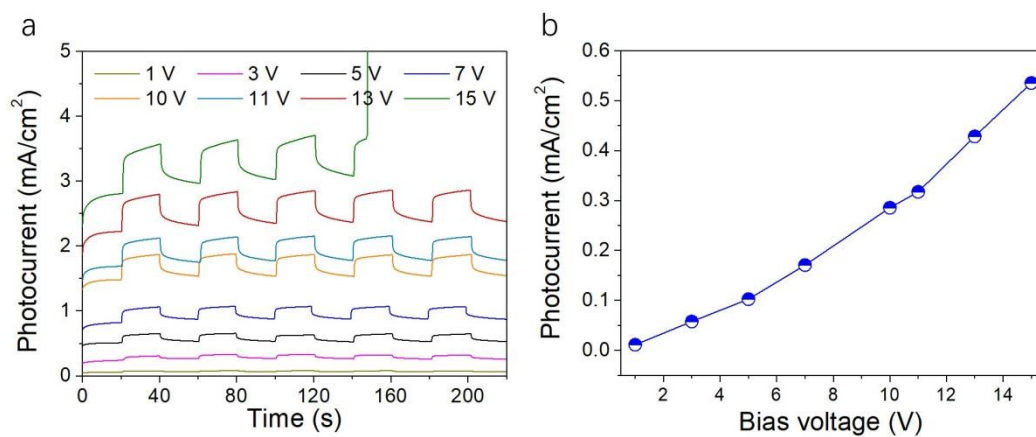

**Figure S8.** (a) The photocurrent curves of Bi<sub>9</sub>O<sub>7.5</sub>S<sub>6</sub>/SnS/ITO film at different bias voltages. (b) Corresponding photocurrent density at different bias voltages.

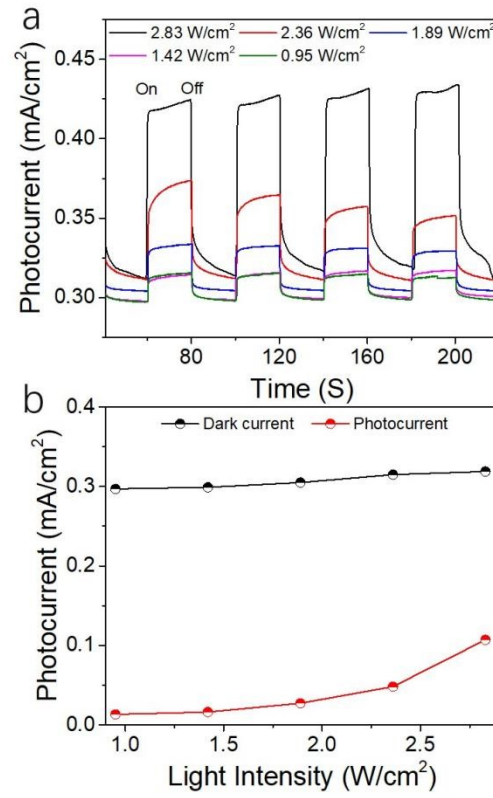

**Figure S9.** (a)  $J-t$  curves of  $\text{Bi}_9\text{O}_{7.5}\text{S}_6/\text{SnS}$  composite film versus the applied light intensity. (b) Photocurrent and dark current densities at different light intensities.

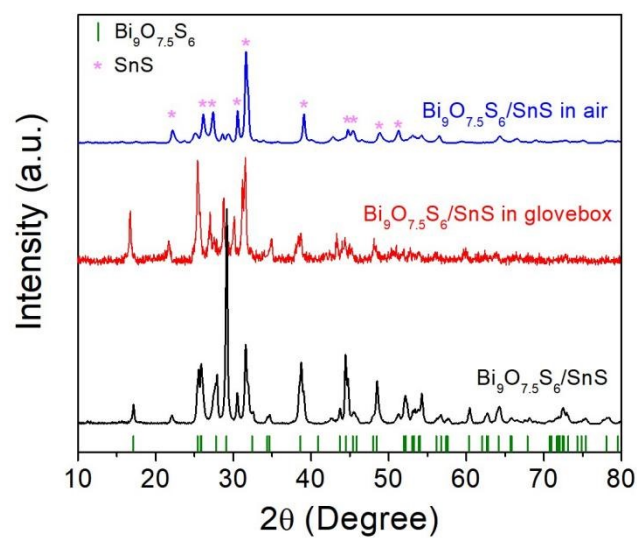

**Figure S10.** The XRD patterns of  $\text{Bi}_9\text{O}_{7.5}\text{S}_6/\text{SnS}$  composite films before and after exposing in air and glovebox for 2 weeks.

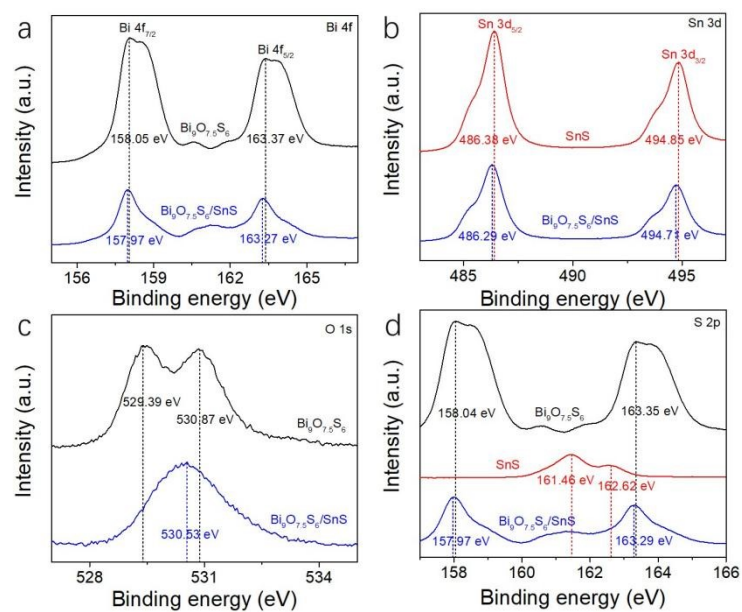

**Figure S11.** XPS spectra of Bi<sub>9</sub>O<sub>7.5</sub>S<sub>6</sub>, SnS and Bi<sub>9</sub>O<sub>7.5</sub>S<sub>6</sub>/SnS: (a) Bi 4f, (b) Sn 3d, (c) O 1s and (d) S 2p spectra.
